# Erratum: “Effect of Strain Gage Length When Determining Residual Stress by Slitting” [Journal of Engineering Materials and Technology, 2007, 129(1), pp. 143–150]

Matthew J. Lee and Michael R. Hill

Corrections were made to Table 1 where the number of significant digits therein were increased to twelve, which is necessary to obtain accurate numerical results (tables available for download from <http://mae.ucdavis.edu/~mhil/jemt129table.html>).

**Table 1 Compliance polynomial fit coefficients,  $b_{jk}$ , for  $l/t=$  (a) 0.005 and (b) 0.100**

(a)  $l/t = 0.005$

| k  | Legendre Order, j  |                    |                    |                    |                    |                    |  |
|----|--------------------|--------------------|--------------------|--------------------|--------------------|--------------------|--|
|    | 2                  | 3                  | 4                  | 5                  | 6                  | 7                  |  |
| 1  | 1.74920284585E-02  | -1.76048323474E-02 | 1.76246520378E-02  | -1.78119306494E-02 | 1.79122265713E-02  | -1.77148735741E-02 |  |
| 2  | -1.00024701861E+01 | 1.00825827872E+01  | -1.01705884313E+01 | 1.03048679151E+01  | -1.04484607744E+01 | 1.05699329871E+01  |  |
| 3  | 3.76070795223E+01  | -6.27499948477E+01 | 9.56259036454E+01  | -1.38265950985E+02 | 1.89178372041E+02  | -2.47125270825E+02 |  |
| 4  | -8.11214247377E+01 | 1.92504672254E+02  | -3.87457302995E+02 | 7.65131054485E+02  | -1.35934336739E+03 | 2.22302568308E+03  |  |
| 5  | -1.92570363355E+02 | -2.65636136667E+02 | 8.95297659854E+02  | -2.65513417656E+03 | 5.81379547945E+03  | -1.11662032238E+04 |  |
| 6  | 3.01284767419E+03  | -1.16989737424E+03 | -1.41018002022E+02 | 6.78060086251E+03  | -1.82002320601E+04 | 3.76094739740E+04  |  |
| 7  | -1.61978375624E+04 | 9.53247791397E+03  | -9.17595921996E+03 | -1.25923814782E+04 | 4.54100664149E+04  | -9.25809494100E+04 |  |
| 8  | 5.47512704236E+04  | -3.49405008918E+04 | 4.39091031650E+04  | 1.49931788868E+04  | -9.12438563921E+04 | 1.67789256952E+05  |  |
| 9  | -1.27899683770E+05 | 8.24066102237E+04  | -1.19130043518E+05 | -6.24376152016E+03 | 1.46406296336E+05  | -2.12242275606E+05 |  |
| 10 | 2.11852485986E+05  | -1.33933776117E+05 | 2.16034111854E+05  | -1.36814781878E+04 | -1.85568657320E+05 | 1.61350332821E+05  |  |
| 11 | -2.48630598542E+05 | 1.51781449398E+05  | -2.70754803690E+05 | 3.09912096678E+04  | 1.82202877177E+05  | -2.65689400032E+04 |  |
| 12 | 2.02332803604E+05  | -1.17892525541E+05 | 2.32353272451E+05  | -3.15851817532E+04 | -1.33737807017E+05 | -8.52055852883E+04 |  |
| 13 | -1.08633555227E+05 | 5.97960233302E+04  | -1.30660194667E+05 | 1.85796615854E+04  | 6.89355941884E+04  | 9.57580590856E+04  |  |
| 14 | 3.46166481643E+04  | -1.78127884576E+04 | 4.33717701582E+04  | -6.09483455871E+03 | -2.21742504668E+04 | -4.52671205082E+04 |  |
| 15 | -4.95931190481E+03 | 2.35775319560E+03  | -6.45453424370E+03 | 8.70000823372E+02  | 3.33580658104E+03  | 8.53653024648E+03  |  |

Table 1a continuation

| k  | Legendre Order, j  |                    |                    |                    |                    |
|----|--------------------|--------------------|--------------------|--------------------|--------------------|
|    | 8                  | 9                  | 10                 | 11                 | 12                 |
| 1  | 1.82386422830E-02  | -1.63163346151E-02 | 1.70724607622E-02  | -8.67649865908E-03 | 5.08344443532E-03  |
| 2  | -1.08186137074E+01 | 1.07258927931E+01  | -1.10377847343E+01 | 9.99579242549E-00  | -9.60609931493E-00 |
| 3  | 3.19538559046E+02  | -3.84232960388E+02 | 4.76693089086E+02  | -5.12040994895E+02 | 5.83036222972E+02  |
| 4  | -3.62182724246E+03 | 5.15846881623E+03  | -7.75494402599E+03 | 9.58268076464E+03  | -1.28070548876E+04 |
| 5  | 2.27434939303E+04  | -3.66310821491E+04 | 6.67681259729E+04  | -9.22529910883E+04 | 1.44199961135E+05  |
| 6  | -9.56282907423E+04 | 1.61781907100E+05  | -3.57581320773E+05 | 5.32771550901E+05  | -9.71363371588E+05 |
| 7  | 3.00907751841E+05  | -4.87603988667E+05 | 1.31059069514E+06  | -2.01061762397E+06 | 4.26541241877E+06  |
| 8  | -7.42640800315E+05 | 1.05428479824E+06  | -3.48387824444E+06 | 5.22295283024E+06  | -1.28591930512E+07 |
| 9  | 1.43756989764E+06  | -1.65869134717E+06 | 6.91468880718E+06  | -9.62619637206E+06 | 2.74539130498E+07  |
| 10 | -2.13740189314E+06 | 1.86499721067E+06  | -1.02924590545E+07 | 1.27470381193E+07  | -4.21410213286E+07 |
| 11 | 2.37212609807E+06  | -1.42153644651E+06 | 1.13119617869E+07  | -1.20587277140E+07 | 4.64942080480E+07  |
| 12 | -1.89103402824E+06 | 6.50519295660E+05  | -8.87593354791E+06 | 7.92140779791E+06  | -3.61683043366E+07 |
| 13 | 1.01926369026E+06  | -1.13523201430E+05 | 4.69007581679E+06  | -3.39559099091E+06 | 1.89001494716E+07  |
| 14 | -3.31770177023E+05 | -3.23796567776E+04 | -1.49334798024E+06 | 8.36385621234E+05  | -5.96525129866E+06 |
| 15 | 4.91763566552E+04  | 1.39965079103E+04  | 2.16403069827E+05  | -8.62459057514E+04 | 8.59482681847E+05  |

(b)  $l/t = 0.100$

| k  | Legendre Order, j  |                    |                    |                    |                    |                    |  |
|----|--------------------|--------------------|--------------------|--------------------|--------------------|--------------------|--|
|    | 2                  | 3                  | 4                  | 5                  | 6                  | 7                  |  |
| 1  | 1.74406595812E-02  | -1.75377226744E-02 | 1.74484531896E-02  | -1.80439606541E-02 | 1.72558996489E-02  | -1.85405180493E-02 |  |
| 2  | -9.96484417712E+00 | 1.00424450136E+01  | -1.01140163189E+01 | 1.03077935775E+01  | -1.03207167473E+01 | 1.06583793683E+01  |  |
| 3  | 3.75523756076E+01  | -6.24928203407E+01 | 9.44651812255E+01  | -1.39791627594E+02 | 1.84319984245E+02  | -2.52302409726E+02 |  |
| 4  | -8.34802894281E+01 | 1.92119471539E+02  | -3.68535602423E+02 | 8.09427242811E+02  | -1.26120486329E+03 | 2.35309608362E+03  |  |
| 5  | -1.54900458131E+02 | -2.73559413314E+02 | 6.70312351355E+02  | -3.25803797461E+03 | 4.60310126305E+03  | -1.29033448920E+04 |  |
| 6  | 2.69944654084E+03  | -1.07528635732E+03 | 1.64290473621E+03  | -1.17255739665E+04 | 8.59308507493E+03  | -5.17815549274E+04 |  |
| 7  | -1.45169054792E+04 | 8.94701670840E+03  | -1.87449564147E+04 | -3.93120838221E+04 | 5.75047128032E+03  | -1.68792083657E+05 |  |
| 8  | 4.85740775325E+04  | -3.25615805223E+04 | 7.95361890518E+04  | -1.14357315415E+05 | 9.74224701224E+04  | 4.49653468073E+05  |  |
| 9  | -1.11935365378E+05 | 7.56895782808E+04  | -2.12818304036E+05 | -2.66389892594E+05 | -3.44563307084E+05 | -9.45628952995E+05 |  |
| 10 | 1.82583658712E+05  | -1.20532011648E+05 | 3.91138500633E+05  | 4.69676943203E+05  | 7.21982996657E+05  | 1.51465427587E+06  |  |
| 11 | -2.1078356594E+05  | 1.32947701992E+05  | -5.01844881867E+05 | -6.02630150034E+05 | -1.00174244817E+06 | -1.78728626985E+06 |  |
| 12 | 1.68602168433E+05  | -9.96555882211E+04 | 4.42763795581E+05  | 5.41126115463E+05  | 9.31263666039E+05  | 1.49332836138E+06  |  |
| 13 | -8.89250243988E+04 | 4.82154495617E+04  | -2.56340841242E+05 | -3.20986629988E+05 | -5.59407734489E+05 | -8.31951411184E+05 |  |
| 14 | 2.78246531100E+04  | -1.34721708396E+04 | 8.77422497521E+04  | 1.12742166401E+05  | 1.96592920363E+05  | 2.76314916463E+05  |  |
| 15 | -3.91337725572E+03 | 1.62982722382E+03  | -1.34617187553E+04 | -1.77320674281E+04 | -3.07216192900E+04 | -4.12824796691E+04 |  |

Table 1b continuation

| k  | Legendre Order, j  |                    |                    |                    |                    |
|----|--------------------|--------------------|--------------------|--------------------|--------------------|
|    | 8                  | 9                  | 10                 | 11                 | 12                 |
| 1  | 1.70142310911E-02  | -1.74790985439E-02 | 1.60621187354E-02  | -8.79598343314E-03 | 6.50076458742E-03  |
| 2  | -1.06069753498E+01 | 1.08613727671E+01  | -1.08573202114E+01 | 9.97558109140E+00  | -9.78198885736E+00 |
| 3  | 3.10279731058E+02  | -3.91062329575E+02 | 4.68409748364E+02  | -5.10741774452E+02 | 5.91104451894E+02  |
| 4  | -3.42743247220E+03 | 5.32461665106E+03  | -7.58203153441E+03 | 9.55609611739E+03  | -1.29965628887E+04 |
| 5  | 2.03545253199E+04  | -3.88535357887E+04 | 6.47137502622E+04  | -9.19680480792E+04 | 1.46789287437E+05  |
| 6  | -7.68766262446E+04 | 1.79969471841E+05  | -3.42093261711E+05 | 5.30646521196E+05  | -9.93587723114E+05 |
| 7  | 2.02075147413E+05  | -5.85286754249E+05 | 1.23204789842E+06  | -1.99915993230E+06 | 4.39171798015E+06  |
| 8  | -3.81606666611E+05 | 1.41374101193E+06  | -3.20707882829E+06 | 5.17629122221E+06  | -1.33516773072E+07 |
| 9  | 5.06582505686E+05  | -2.58677501039E+06 | 6.22524430583E+06  | -9.48528146316E+06 | 2.8799958504E+07   |
| 10 | -4.32149906897E+05 | 3.56101539699E+06  | -9.07323531569E+06 | 1.24392108651E+07  | -4.47426180855E+07 |
| 11 | 1.68363030994E+05  | -3.60307866729E+06 | 9.79348732507E+06  | -1.15837132525E+07 | 5.00327282003E+07  |
| 12 | -7.18990061559E+04 | 2.58097449069E+06  | -7.57634377695E+06 | 7.41908510615E+06  | -3.94818433422E+07 |
| 13 | -1.26801522602E+05 | -1.23147735654E+06 | 3.96400978949E+06  | -3.04999480951E+06 | 2.09340082753E+07  |
| 14 | 6.27924226857E+04  | 3.48791067871E+05  | -1.25546691254E+06 | 6.97176004747E+05  | -6.70193210788E+06 |
| 15 | -1.15046012960E+04 | -4.39647484446E+04 | 1.81839420578E+05  | -6.13476202597E+04 | 9.78834249488E+05  |
